# Supplementary material
Source: PubMed Central journal article supplement (PMC4121847)
Supplement: 1402819111_pnas.201402819SI.pdf [file 1402819111_pnas.201402819SI.pdf]

# Supporting Information

Chi et al. 10.1073/pnas.1402819111

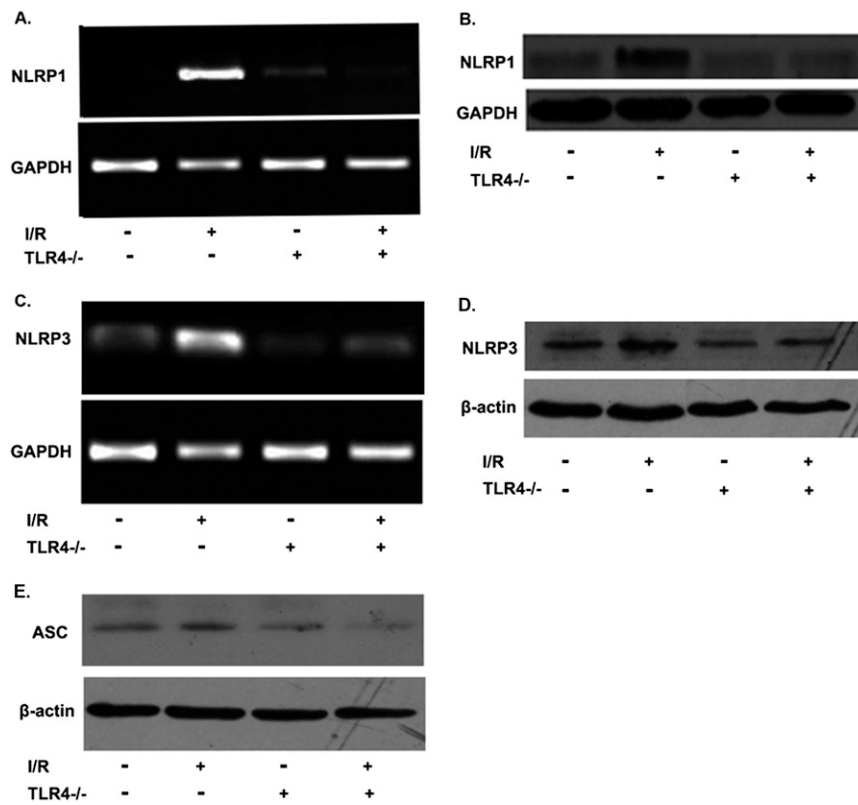

**Fig. S1.** Knockdown of Toll-like receptor 4 (TLR4) suppressed the intraocular pressure (IOP)-induced activation of NLRP1 (A and B), NLRP3 (C and D), and Apoptosis-associated speck-like protein containing CARD (ASC) (E) ( $n = 12$ , all). Representative images are shown.



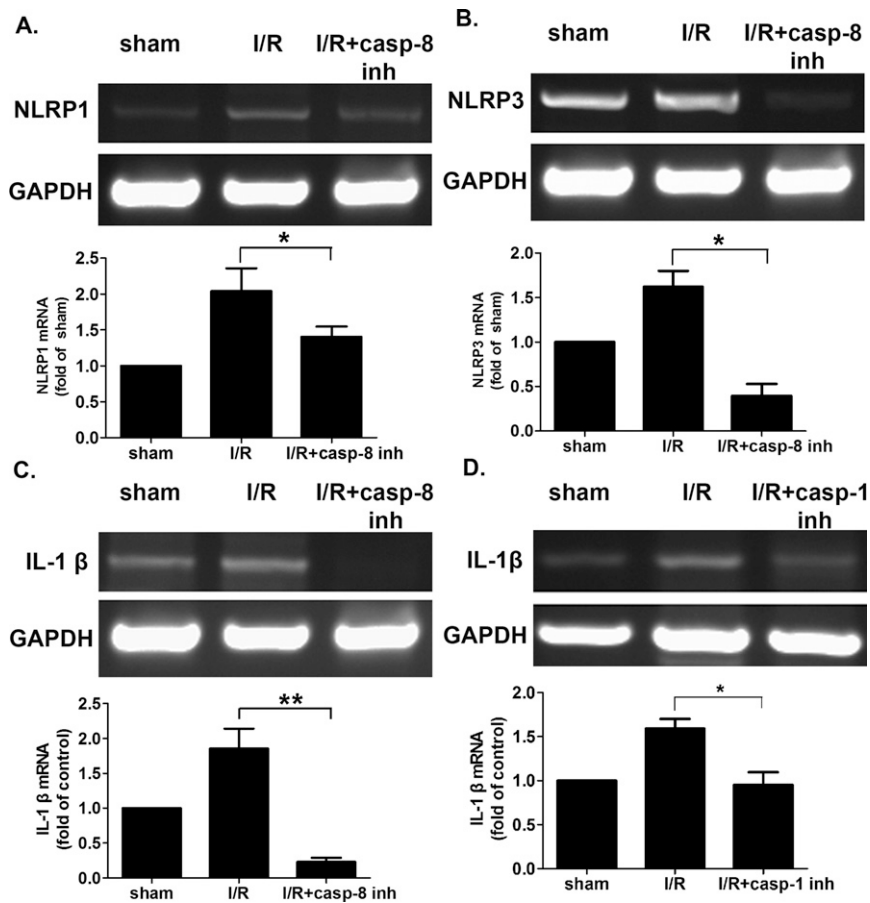

**Fig. S3.** Caspase-8 was necessary for processing of IL-1 $\beta$  via caspase-1–dependent NLRP1 and NLRP3 inflammasome activation and the caspase-1–independent pathway in rats. Inhibition of caspase-8 by intravitreal injection of Z-IETD-fmk (20  $\mu$ M) significantly suppressed IOP-induced NLRP1 (A) ( $n = 9$ ) and NLRP3 (B) ( $n = 9$ ) activation in rat acute glaucoma models. (C) Inhibition of caspase-8 completely suppressed the processing of IL-1 $\beta$  ( $n = 9$ ). (D) Intravitreal injection of caspase-1 inhibitor, Z-YVAD-fmk (20  $\mu$ M), only partially reduced the processing of IL-1 $\beta$  ( $n = 9$ ). Representative images are shown. Data are presented as mean  $\pm$  SD; \* $P < 0.05$ , \*\* $P < 0.001$ .

**Table S1.** Mouse primer sequences including annealing temperature and product size

| Gene         | Primer sequence<br>(forward primer, reverse primer) (5'-3') | Annealing<br>temperature, $^{\circ}$ C | Product size, bp |
|--------------|-------------------------------------------------------------|----------------------------------------|------------------|
| TLR4         | GAGCCGTTGGTGTATCTTTGA<br>CTCCATTCCAGGTAGGTGTT               | 55                                     | 166              |
| Caspase-8    | CTCCGAAAAATGAAGGACAGA<br>CGTGGGATAGGATACAGCAGA              | 59                                     | 193              |
| Caspase-3    | AAGGAGCAGCTTTGTGTGTGT<br>AAGAGTTTCGGCTTTCCAGTC              | 59                                     | 144              |
| NLRP1        | GCCAAAGAGGCTCAGAAAACT<br>CAAGTAACTGCCAGCAGAG                | 59                                     | 474              |
| NLRP3        | GGTCCTTTTACCATGTGCTTC<br>AAGTCATGTGGCTGAAGCTGTA             | 59                                     | 365              |
| IL-1 $\beta$ | TGAAATGCCACCTTTTGACAG<br>CCACAGCCACAATGAGTGATAC             | 60                                     | 185              |
| GAPDH        | AGGTCATCCAGAGCTGAACG<br>CACCTGTTGCTGATAGCCGTAT              | 55                                     | 269              |

**Table S2. Rat primer sequences including annealing temperature and product size**

| Gene         | Primer sequence<br>(forward primer, reverse primer) (5'-3') | Annealing<br>temperature, °C | Product size, bp |
|--------------|-------------------------------------------------------------|------------------------------|------------------|
| TLR4         | CAGGGAATTAGGCTCCATGA<br>TCCATGACAGAACGGTCAAA                | 58                           | 164              |
| Caspase-8    | CTGGGAAGGATCGACGATTA<br>TGGTCACCTCATCCAAAACA                | 54                           | 100              |
| Caspase-3    | GAAACCTCCGTGGATTCAAA<br>AGCCCATTTCAAGGTAATCC                | 56                           | 124              |
| NLRP1        | TTGACATCAAGGCTGAGCAC<br>CTTGCTGGCGTTTCTAGGAC                | 59                           | 142              |
| NLRP3        | GGGACTCAAGCTCCTCTGTG<br>GAGGCTCTGGTTATGGGTCA                | 56                           | 133              |
| ASC          | TGGCTACTGCAACCAGTGTC<br>CCATACAGAGCATCCAGCAA                | 57                           | 124              |
| IL-1 $\beta$ | CAGGAAGGCAGTGCTCACTCA<br>AAAGAAGGTGCTTGGGTCTCT              | 60                           | 100              |
| GAPDH        | TGCCACTCAGAAGACTGTGG<br>GTCCTCAGTGTAGCCAGGA                 | 56                           | 292              |
